# Supplementary material for: Long-term (up to 4.5 years) treatment with fingolimod in multiple sclerosis: results from the extension of the randomised TRANSFORMS study
Source: HighWire-hosted journal article supplement (doi:10.1136/jnnp-2015-310597), 2015-06-25
Supplement: jnnp-2015-310597supp.pdf [file jnnp-2015-310597supp.pdf]

## **SUPPLEMENT**

### **Methodological details and additional results not presented in the main text.**

#### **Assessments**

##### **Exploratory responders analysis**

In this post hoc analysis, patients were classified based on presence (+) or absence (-) of clinical and MRI disease activity after 1 year of therapy (fingolimod or IFN  $\beta$ ) for the following variables:

- Confirmed relapse (R+/R-): occurring during Year 1 on treatment
- 3-month confirmed disability progression (P+/P-): positive status defined as a one-point increase in the EDSS score
- MRI activity (MRI+/MRI-): positive status, if the sum of the number of new or newly enlarged T2 lesions at Month 12 compared with baseline and the number of Gd-enhanced T1 lesions at Month 12 was >2

##### **Outcomes and time points**

- No evidence of clinical disease activity status: defined as no relapses and no 6-month disability progression. Evaluated from the beginning of the Extension (M12) through the end of the study (EOS)
- No evidence of disease activity status: defined as no relapses, no 3-month disability progression and no MRI activity. Evaluated at the end of Year 1 in both the continuous fingolimod and IFN-switch groups and for the IFN-switch group alone at the end of Year 2, to assess the 12-month treatment effect with fingolimod following the switch from IFN

**Results:****Supplement Table 1: Odds of being free of clinical disease activity\* during extension phase (M13-EOS), by treatment, based on disease activity during core phase (M0-12)**

| Year 1 response groups                                                                                                                                                                                                                                                                                                                                                                                                                                                                                                                                                                                                                                                                                                                                                                                                                                                                                                                                                                                        | n   | Odds ratios | 95% CI       | P-value |
|---------------------------------------------------------------------------------------------------------------------------------------------------------------------------------------------------------------------------------------------------------------------------------------------------------------------------------------------------------------------------------------------------------------------------------------------------------------------------------------------------------------------------------------------------------------------------------------------------------------------------------------------------------------------------------------------------------------------------------------------------------------------------------------------------------------------------------------------------------------------------------------------------------------------------------------------------------------------------------------------------------------|-----|-------------|--------------|---------|
| <b><i>Continuous-fingolimod group (N=628)</i></b>                                                                                                                                                                                                                                                                                                                                                                                                                                                                                                                                                                                                                                                                                                                                                                                                                                                                                                                                                             |     |             |              |         |
| 0 positives                                                                                                                                                                                                                                                                                                                                                                                                                                                                                                                                                                                                                                                                                                                                                                                                                                                                                                                                                                                                   | 398 | 1           |              |         |
| 1 positive                                                                                                                                                                                                                                                                                                                                                                                                                                                                                                                                                                                                                                                                                                                                                                                                                                                                                                                                                                                                    | 180 | 0.63        | (0.44, 0.90) | 0.012   |
| 2 positives                                                                                                                                                                                                                                                                                                                                                                                                                                                                                                                                                                                                                                                                                                                                                                                                                                                                                                                                                                                                   | 48  | 0.35        | (0.19, 0.64) | <0.001  |
| 3 positives                                                                                                                                                                                                                                                                                                                                                                                                                                                                                                                                                                                                                                                                                                                                                                                                                                                                                                                                                                                                   | 2   | 0.10        | (0.00, 3.99) | 0.218   |
| <b><i>IFN-switch group (N=296)</i></b>                                                                                                                                                                                                                                                                                                                                                                                                                                                                                                                                                                                                                                                                                                                                                                                                                                                                                                                                                                        |     |             |              |         |
| 0 positives                                                                                                                                                                                                                                                                                                                                                                                                                                                                                                                                                                                                                                                                                                                                                                                                                                                                                                                                                                                                   | 131 | 1           |              |         |
| 1 positive                                                                                                                                                                                                                                                                                                                                                                                                                                                                                                                                                                                                                                                                                                                                                                                                                                                                                                                                                                                                    | 117 | 0.53        | (0.32, 0.90) | 0.018   |
| 2 positives                                                                                                                                                                                                                                                                                                                                                                                                                                                                                                                                                                                                                                                                                                                                                                                                                                                                                                                                                                                                   | 43  | 0.40        | (0.20, 0.81) | 0.011   |
| 3 positives                                                                                                                                                                                                                                                                                                                                                                                                                                                                                                                                                                                                                                                                                                                                                                                                                                                                                                                                                                                                   | 5   | 0.33        | (0.05, 2.01) | 0.228   |
| <p>1. Data was fit to a logistic regression model with Year 1 positive response count groups as a categorical predictor variable. Odds ratios, confidence intervals, and p-values are estimated using Firth's penalized likelihood method. Each group is compared with the 'No positives' group, which is used as a reference group.</p> <p>2. The number of positives are counted in the Year 1 confirmed relapse/3-month confirmed disability progression/MRI activity response subgroups. For example, 3 positives is the R+/P+/MRI+ group. R=Confirmed relapse in Year 1; P=3-month confirmed disability progression in Year 1; MRI=MRI activity (# new/newly enlarged T2 lesions at Month 12 compared to baseline + # Gd+ T1 lesions at Month 12 &gt; 2). +=Present; -=Absent.</p> <p>* Clinical disease activity free status is defined as no confirmed relapses and no 6-month confirmed disability progression during Year 2 to end of study.</p> <p>M, month; EOS, end of study; IFN, interferon</p> |     |             |              |         |

**Supplement Table 2: Safety profile in the continuous-fingolimod 1.25 mg group and the IFN-switch 1.25 mg group**

|                                                                               | Fingolimod 1.25 mg<br>(N=330) | IFN-switch fingolimod<br>1.25 mg<br>(N=174) |
|-------------------------------------------------------------------------------|-------------------------------|---------------------------------------------|
| <b>Adverse event, n (%)</b><br><b>(at least 10% in either of the groups*)</b> |                               |                                             |
| <b>Overall AEs</b>                                                            | 312 (94.5)                    | 168 (96.6)                                  |
| Lymphopenia                                                                   | 117 (35.5)                    | 66 (37.9)                                   |
| Nasopharyngitis                                                               | 105 (31.8)                    | 53 (30.5)                                   |
| Headache                                                                      | 51 (15.5)                     | 36 (20.7)                                   |
| Upper respiratory tract infection                                             | 47 (14.2)                     | 28 (16.1)                                   |
| Back pain                                                                     | 43 (13.0)                     | 18 (10.3)                                   |
| Urinary tract infection                                                       | 40 (12.1)                     | 10 (5.7)                                    |
| Melanocytic nevus                                                             | 37 (11.2)                     | 16 (9.2)                                    |
| Cough                                                                         | 32 (9.7)                      | 22 (12.6)                                   |
| Diarrhoea                                                                     | 28 (8.5)                      | 20 (11.5)                                   |
| ALT increased                                                                 | 25 (7.6)                      | 19 (10.9)                                   |
| <b>SAE, n (%)</b><br><b>(at least two patients in either of the groups*)</b>  |                               |                                             |
| <b>Overall SAEs</b>                                                           | 40 (12.1)                     | 37 (21.3)                                   |
| Lymphopenia                                                                   | 1 (0.3)                       | 2 (1.1)                                     |
| Bradycardia                                                                   | 1 (0.3)                       | 2 (1.1)                                     |
| 2nd degree AV block                                                           | 0                             | 2 (1.1)                                     |
| Vertigo                                                                       | 2 (0.6)                       | 2 (1.1)                                     |
| Macular oedema                                                                | 0                             | 2 (1.1)                                     |
| Herpes zoster                                                                 | 3 (0.9)                       | 1 (0.6)                                     |
| Pneumonia                                                                     | 3 (0.9)                       | 0                                           |
| Basal cell carcinoma                                                          | 2 (0.6)                       | 2 (1.1)                                     |
| Multiple sclerosis relapse                                                    | 4 (1.2)                       | 0                                           |
| Dyspnoea                                                                      | 2 (0.6)                       | 0                                           |
| Menorrhagia                                                                   | 0                             | 2 (1.1)                                     |

\*AE and SAE profile for the continuous fingolimod 0.5 mg and IFN-switch fingolimod 0.5 mg presented in the main manuscript.

AE, adverse event; ALT, alanine transaminase; IFN, interferon; SAE, serious adverse event.

## Principal investigators of the TRANSFORMS Extension study

**Dr. Xavier Montalban**, Hospital Vall D'Hebron, Barcelona 08035, Spain; **Dr. Txomin Arbizu**, Ciutat Sanitaria I Universitaria De Bellvitge, Hospitalet de Llobregat 08907, Spain; **Dr. Oscar Fernandez**, Complejo Hospitalario Carlos Haya, Málaga 29010, Spain; **Dr. Guillermo Izquierdo**, Hospital Universitario Virgen Macarena, Sevilla 41009, Spain; **Dr. Rafael Arroyo**, Hospital Clinico San Carlos, Madrid 28040, Spain; **Dr. Bonaventura Casanova**, Hospital Universitario La Fe, Valencia 46009, Spain; **Dr. Jose Antonio Garcia Merino**, Hospital Universitario Puerta De Hierro, Madrid 28035, Spain; **Dr. Jose Antonio Garcia Merino**, Hospital Universitario Puerta De Hierro, Madrid 28035, Spain; **Dr. Alfredo Antigüedad**, Hospital De Basurto, Bilbao 48013, Spain; **Pr Jean Pelletier**, CHU La Timone Marseille cedex 05 13385 France; **Pr Bruno Brochet**, Hôpital Pellegrin Bordeaux Cedex 33076 France; **Dr. Marc Debouverie**, Hopital Central, Nancy 54035, France; **Dr. Christine Lebrun-Frenay**, Hoppital Pasteur, Archet II Nice Cedex 1 06602, France; **Prof. Michel Clanet**, Hopital De Purpan, Toulouse Cedex 31059, France; **Dr. Olivier Heinzlef**, Centre Hospitalier de Poissy, Poissy 78303, France; **Dr. Christian Sindic**, Cliniques Universitaires Saint-Luc, Bruxelles Belgium 1200, Belgium; **Dr. Marie D'hooghe**, Nationaal Multiple Sclerose Centrum v.z.w., Melsbroek 1820, Belgium; **Dr. Véronique Bissay**, UZ Brussel, Jette 1090, Belgium; **Dr. Eddy Mulleners**, Regional Ziekenhuis Sint-Trudo - Campus Sint-Jozef, Sint-Truiden 3800, Belgium; **Prof. Giancarlo Comi**, Istituto Scientifico San Raffaele – IRCCS, Milano MI 20132, Italy; **Dr. Angelo Ghezzi**, Ospedale S. Antonio Abate, Gallarate VA 21013, Italy; **Prof. Gianluigi Mancardi**, Az. Osp. Ospedale S. Martino - Università degli Studi, Genova GE 16132, Italy; **Prof. Carlo Pozzilli**, Azienda Ospedaliera Sant'Andrea - Università La Sapienza, Roma RM 00189, Italy; **Prof. Mauro Silvestrini**, AOU Ospedali Riuniti Umberto I - GM Lancisi - G. Salesi, Torrette di Ancona AN 60020, Italy; **Dr. Roberto Bergamaschi**, IRCCS Neurologico C. Mondino, Pavia PV 27100, Italy; **Prof. Elio Scarpini**, Osp. Magg. Pol. Mangiagalli e Regina Elena - Fond. IRCCS, Milano MI 20122, Italy; **Dr. Antonio Bertolotto**, Azienda Sanitaria Osp. S. Luigi Gonzaga, Orbassano TO 10043, Italy; **Dr. Ruggero Capra**, Presidio Ospedaliero di Montichiari, Montichiari BS 25018, Italy; **Prof. Maria Pia Amato**, Azienda Ospedaliera Careggi - Università degli Studi, Firenze FI 50134, Italy; **Prof. Alessandra Lugaresi**, Osp. Clinicizzato SS. Annunziata Colle dell'Ara, Chieti CH 66100, Italy; **Dr. Maria Giovanna Marrosu**, Presidio Ospedaliero Roberto Binaghi, Cagliari CA 09126, Italy; **Dr. Francesco Patti**, Istituto di Scienze Neurologiche Università di Catania, Catania CT 95123, Italy; **Dr. Vincenzo Brescia Morra**, Policlinico - Università degli Studi, Federico II Napoli NA 80131, Italy; **Dr. V Bonavita**, **Dr. Enrico Montanari**, Presidio Ospedaliero di Vaio Fidenza, Fidenza PR 43036, Italy; **Dr. Alessandra Protti**, Az. Osp. Niguarda Ca' Granda, Milano MI 20162, Italy; **Prof. Stefano Ruggieri**, 1st Neurol. Mediterraneo Neuromed, Pozzilli IS 86077, Italy; **Prof. Diego Centonze**, Az. Osp. Universitaria Policlinico Tor Vergata, Roma RM 00133, Italy; **Dr. Maria Rosaria Tola**, Azienda Ospedaliera Universitaria Arcispedale Sant'Anna, Ferrara FE 44100, Italy; **Prof. Sergio Stecchi**, Ospedale Bellaria Maggiore, Bologna BO 40139, Italy; **Prof. Dr. Saher Hashem**, Saher Hashem Private Clinic, Cairo, Egypt; **Prof. Dr. Elbahey Reda**, Elbahey Reda Private clinic, Egypt; **Prof. Dr. Magd Fouad**, Magd Fouad Private Clinic, Cairo, Egypt; **Prof. Dr. Sherif Hamdy**, Sherif Hamdy Private Clinic, Cairo, Egypt; **Prof. Dr. Mohamed Ramadan**, Mohamed Ramadan Private Clinic, Alexandria, Egypt; **Dr. Carl Baum**, Oberhavel Kliniken GmbH, Henningsdorf, Germany; **PD Dr. med. Achim Berthele**, Klinikum der TU München, München 81675, Germany; **Dr. med. Florian Bethke**, Westfaelische Klinik Lengerich, Lengerich 49525, Germany; **Dr. med. Rainer Bachus**, Gemeinschaftspraxis Dr. Burger-Deinerth/Dr. Bachus, Berlin 13439, Germany; **Prof. Dr. med. Hans-Christoph Diener**, Klinik und Poliklinik für Neurologie, Essen 45122, Germany; **Dr. med. Alexander Dressel**, Universitaetsklinik Greifswald, Greifswald 17475, Germany; **PD Dr. med. Matthias Maschke**, Krankenhaus der Barmherzigen Brüder, Trier 54292, Germany; **Dr. med Ulrich Hofstadt-van Oy**, Krankenhaus der Barmherzigen Brüder, Trier 54292, Germany; **Dr. med. Riccarda Diem**, Universitaetskliniken des Saarlandes, Homburg 66421, Germany; **Dr. med Stefan Jung**, Universitaetskliniken des Saarlandes, Homburg 66421, Germany; **Dr.**

**med. Philipp Erdmann**, Universitaetskliniken des Saarlandes, Homburg 66421, Germany; **Dr. med. Gunther Karlbauer**, Praxis Dr. Karlbauer, Muenchen 80331, Germany; **Prof. Dr. Frank Thomke**, Johannes Gutenberg-Universität Mainz, Mainz 55131, Germany; **PD Dr med Jurgen Kohler**, Johannes Gutenberg-Universität Mainz, Mainz 55131, Germany; **Dr. med. Wolfgang Koehler**, Saechsisches Krankenhaus, Hubertusburg Wermsdorf 04779, Germany; **Prof. Dr. med. Peter Krauseneck**, Klinikum Bamberg, Bamberg 96049, Germany; **Dr. med. Michael Lang**, NeuroPoint GmbH, Ulm 89073, Germany; **PD Dr. Volker Limmroth**, Staedt. Krankenhaus Merheim, Koeln 51109, Germany; **Dr. med. Konrad Luckner**, Krankenhaus Buchholz u. Winsen gemeinnützige GmbH 21244 Buchholz, Germany; **Prof. Dr. med. Martin Klein**, Medizinisches Studienzentrum, Würzburg 97070, Germany; **Prof. Dr. Sebastian Rauer**, Univ.-Klinikum Freiburg, Freiburg 79106, Germany; **Dr. med. Gerd Reifschneider**, Neuro Centrum Odenwald-Reifschneider-Unsorg-Ries, Erbach/Odenwald 64711, Germany; **Dr. med. Klaus Tiel-Wilck**, Neurologisches Facharztzentrum Berlin, Berlin 10713, Germany; **Prof. Andreas Kastrup**, Klinikum Bremen-Mitte Gesundheit Nord GmbH, Bremen 28177, Germany; **Dr. med. Markus Ebke**, Klinikum Bremen-Mitte Gesundheit Nord gGmbH, Bremen 28177, Germany; **PD Dr. med. Martin Stangel**, Kliniken d. Medizinischen Hochschule Hannover, Hannover 30623, Germany; **Prof. Dr. med. Hayrettin Tumani**, Neurologische Poliklinik der Universitaet Ulm, Ulm 89075, Germany; **Prof. Dr. Brigitte Wildemann**, Klinikum der Universität Heidelberg, Heidelberg 69120, Germany; **Dr. med. Tjalf Ziemssen**, Universitaetsklinikum der TU Dresden, Dresden 01307, Germany; **Dr. Juergen Faiss**, Asklepios Landeslinik Teupitz, Teupitz 15755, Germany; **Dr med Nannette Altmann**, Praxis Dr. Altmann, Potsdam 14471, Germany; **Prof. Dr. Karl Vass**, Univ.-Klinik fuer Neurologie AKH, Vienna 1090, Austria; **Dr. Ulf Baumhackl**, Department of Neurology, Landesklinikum, 3100 St. Poelten, Austria; **Dr. Claudia Franta-Elmer**; **Prof. Dr. Thomas Berger**, Universitätsklinik f. Neurologie Innsbruck, Innsbruck 6020, Austria; **Prof. Dr. Eva-Maria Maida**, Evangel.Krankenh./Wien-Waehring Außenstelle, Vienna 1010, Austria; **Prof. Dr. Franz Aichner**, OO. Landes-Narvenklinik Wagner-Jauregg, Linz A-4020, Austria; **Prof. Dr. Joerg Kraus**, Landes-Nervenlinik Christian Doppler Klinik, Salzburg A-5020, Austria; **Prim. Univ. Prof. Dr. Guenther Ladurner**, Landes-Nervenlinik Christian Doppler Klinik, Salzburg A-5020, Austria; **Prof. Dr. med. Ludwig Kappos**, Universitätsspital Basel, Basel, Switzerland; **Prof. Dr. Norbert Goebels**, Universitätsspital Zuerich, Zuerich 8091, Switzerland; **PD Dr. Michael Linnebank**, Universitätsspital Zuerich, Zuerich 8091, Switzerland; **Dr. Jorge Correale**, FLENI Buenos Aires C1428AQK, Argentina; **Dr. Fernando Caceres**, Instituto de Neurociencias Buenos Aires INEBA Capital Federal Buenos Aires C1192AAW, Argentina; **Dr. Orlando Garcea**, Hospital J. M. Ramos Mejia, Buenos Aires C1221ADC, Argentina; **Dr. Edgadro Cristiano**, Hospital Italiano de Buenos Aires, Buenos Aires C1181ACK, Argentina; **Dr. Raul Piedrabuena**, Fundacion Lenox, Cordoba 5000, Argentina; **Dr. Carlos Ballario**, Fundacion Rosarina de Neurorehabilitacion, Rosario Santa Fe 2000, Argentina; **Dra. Geraldine Luetic**, Instituto de Neurociencias de Rosario, Rosario Santa Fe 2000, Argentina; **Dr. Regina Alvarenga**, Hospital Universitario Gaffree e Guinle, Rio de Janeiro RJ 20270-004, Brazil; **Dr. Rogerio Naylor**, Hospital dos Servidores do Estado-Rio de Janeiro, Rio de Janeiro RJ 20221-903, Brazil; **Dr Benito Damasceno**, Hospital das Clinicas – UNICAMP, Campinas SP 13083-970, Brazil; **Dr. Sergio Haussen**, Irmandade da Santa Casa de Misericordia de Porto Alegre, Porto Alegre RS 90020-090, Brazil; **Dr. Aroldo Bacellar**, Hospital Sao Rafael, Salvador BA 41256 900, Brazil; **Dr Amilton Barreira**, Hospital das Clinicas da FMRPUSP, Ribeirao Preto SP 48000-900, Brazil; **Prof. John Pollard**, Royal Prince Alfred Hospital, Camperdown NSW 2050, Australia; **Dr. Micheal Barnett**, Royal Prince Alfred Hospital, Camperdown NSW 2050, Australia; **Dr. Susanne Hodgkinson**, Liverpool Hospital, Liverpool New South Wales 2170, Australia; **Dr Raymond Schwartz**, St George Private Hospital, Kogarah NSW 2217, Australia; **Prof. John King**, Royal Melbourne Hospital, Parkville VIC 3050, Australia; **Dr. Helmut Butzkueven**, Box Hill Hospital, Box Hill Vic 3128, Australia; **A/Prof. Robert Heard**, Gosford Private Hospital, North Gosford NSW 2250, Australia; **Dr. Roy Beran**, Strategic Health Evaluators, Chatswood NSW 2067, Australia; **Dr. Mark Cascione**, Axiom Clinical Research of Florida, Tampa FL 33609, United States; **Dr. Bhupesh Dihenia**, Private Practice, Lubbock TX 79410, United States; **Dr. Suzanne Gazda**, Integra Clinical Research,

San Antonio TX 78229, United States; **Dr. Samuel Hunter**, Advanced Neurosciences Institute, Franklin TN 37064, United States; **Dr. Amir Mazhari**, Neurology & Neuroscience Associates, Inc., Akron OH 44302, United States; **Dr. Christopher LaGanke**, North Central Neurology Associates, PC Cullman AL 35058, United States; **Dr. Sharon Lynch**, University of Kansas Medical Center, Kansas City KS 66160, United States; **Dr. Galen Mitchell**, University of Pittsburgh, Pittsburgh PA 15213, United States; **Dr. Michael Olek**, Rockwood Clinic, Spokane, WA 99202, United States; **Dr. Sylvia Rojas**, Rockwood Clinic, Spokane, WA 99202, United States; **Dr. Silvia Delgado**, University of Miami, Miami, FL 33136, United States; **Dr. David Greco**, Associated Neurologists, P.C., Danbury, CT 06810, United States; **Dr. Lily Jung**, Swedish Neuroscience Institute, Seattle, WA 98122, United States; **Dr. Barry Singer**, Barnes-Jewish Hospital at the Washington University, St. Louis, MO 63110, United States; **Dr. Earl Wilson**, Mountain Empire Neurological Associates, PC Bristol, TN 37620, United States; **Dr. Michael Kaufman**, Neuroscience and Spine Institute, Charlotte, NC 28207, United States; **Dr. S. Mitchell Freedman**, Raleigh Neurology Associates, Raleigh, NC 27607, United States; **Dr. Brian Steingo**, Neurological Associates, Pompano Beach, FL 33060, United States; **Dr. William Bauer**, Northern Ohio Neuroscience, LLC Bellevue, OH 44811, United States; **Dr. Jeffrey Cohen**, Cleveland Clinic Foundation, Cleveland, OH 44195, United States; **Dr. Charles Brock**, University of South Florida, Tampa, FL 33612, United States; **Dr. Peter Dunne**, University of South Florida, Tampa, FL 33612, United States; **Dr. Daniel Kantor**, University of Florida, Jacksonville, FL 32209, United States; **Dr. Gauri Pawar**, West Virginia University – Clinical Trials Research Unit, Morgantown, WV 26506-9260, United States; **Dr. Thomas Chippendale**, The Neurology Center, Oceanside, CA 92056, United States; **Dr. William Honeycutt**, Neurology Associates, Maitland, FL 32751, United States; **Dr. Stuart Shafer**, MS Center of Vero Beach, Vero Beach, FL 32960, United States; **Dr. John Absher**, Absher Neurology, Greenville, SC 29615, United States; **Dr. Timothy Vollmer**, Barrow Neurological Clinics at St. Joseph's Hospital and MC, Phoenix, AZ 85013, United States; **Dr. Bhupendra Khatri**, St. Luke's Medical Center Aurora Health Care, Milwaukee, WI 53215, United States; **Dr. Vernon Rowe**, Mid America Neuroscience Institute, Lenexa, KS 66214, United States; **Dr. Paul Ash**, Oregon Neurology, PC Tualatin, OR 97062, United States; **Dr. George Hutton**, Baylor College of Medicine, Houston, TX 77030, United States; **Dr. Ricardo Ayala**, AMO Corporation, Tallahassee, FL 32308, United States; **Dr. Jack Antel**, Montreal Neurological Institute, Montreal, Quebec H3A 2B4, Canada; **Dr. Virginia Devonshire**, UBC Hospital, Vancouver, BC V6T 2B5, Canada; **Dr. Mark Freedman**, The Ottawa General Hospital, Ottawa, K1H 8L6, Canada; **Dr. François Grand'maison**, Charles Lemoyne Hospital, Greenfield Park, Quebec J4V 2H1, Canada; **Dr. Albert Lamontagne**, Centre Hospitalier Universitaire de Sherbrooke, Fleurimont, QC J1H 5N4, Canada; **Dr. Paul O'Connor**, St. Michael's Hospital, Toronto, ON M5B 1W8, Canada; **Dr. Galina Vorobeychik**, Fraser Health MS Clinic, Burnaby, BC V5G 2X6, Canada; **Dr. Pierre Duquette**, CHUM - Hopital Notre-Dame Montreal, QC H2L 4M1, Canada; **Dr. Suzanne Christie**, Nepean Medical Centre, Nepean, ON K2G 6E2, Canada; **Dr. Gabor Jakab**, Uzsoki kórház, Budapest 1145, Hungary; **Dr. Laszlo Bartos**, Veszprem Megyei Csolnoky Ferenc Kórház, Veszprem H-8200, Hungary; **Dr. Attila Csanyi**, Petz Aladár Megyei Oktató órház Győr 9024, Hungary; **Prof. Dr. Laszlo Csiba**, Debreceni Egyetem Orvos es Egszstd. Centr., Debrecen 4012, Hungary; **Dr. Gyula Panczel**, Peterfy Sandor utcai Kórház, Budapest 1076, Hungary; **Dr. Carolyn Young**, The Walton Centre for Neurology and Neurosurgery, Liverpool L9 7LJ, United Kingdom; **Dr Martin Lee**, Norfolk & Norwich University Hospital, Norwich NR4 7UY, United Kingdom; **Dr Richard Nicholas**, Charing Cross Hospital, London W8 6RF, United Kingdom; **Prof. Ho-Jin Kim**, National Cancer Center, Kyunggi goyang 411-764, Republic of Korea; **Prof. Kwang-Ho Lee**, Samsung Medical Center, Seoul Korea 135-710, Republic of Korea; **Prof. Seung-Min Kim**, Yonsei University College of Medicine Severance Hospital Seoul, Seoul 120 752, Republic of Korea; **Prof. Sung-Pa Park**, Kyung Pook National University Hospital, Taegu 700 – 721, Republic of Korea; **Prof. Alexandros Papadimitriou**, Errikos Dinan General Hospital, Athens 11526, Greece; **Director Dimitrios Liakopoulos**, Metropolitan Hospital, Athens GR 18547, Greece; **Director Klementene Karageorgiou**, General Hospital of Athens G. Gennimatas, Athens G-156 69, Greece; **Prof. Nikolaos Tascos**, Ahepa University General

Hospital of Thessaloniki, Thessaloniki GR 54636, Greece; **Prof. Panagiotis Papathanasopoulos**, General University Hospital of Patra-RIO, Patra - RIO GR- 26500, Greece; **Prof. Andreas Plaitakis**, University Hospital of Heraklion, Heraklion Crete GR 711 10, Greece; **Dr. Paulo Fontoura**, Hospital de S. Bernardo, Setubal 2910-446, Portugal; **Dr. Rui Pedrosa**, Hospital Sto. António dos, Capuchos, Portugal; **Dr. Ricardo Genistal**, Hospital Fernando Fonseca, Amadora 2720-276, Portugal; **Dr. Vasco Salgado**, Hospital Fernando Fonseca, Amadora 2720-276, Portugal; **Prof. Dr. Luís Cunha**, Hospitais da Universidade de Coimbra, Coimbra 3000-075, Portugal; **Prof. Dra. Maria José Sá**, Hospital de São João, Porto 4200-319, Portugal.
